# Supplementary material
Source: Springer Nature journal article supplement (https://www.springermedizin.de/resource/supplementary/13633_2014_352_MOESM9_ESM.pdf/9596138)

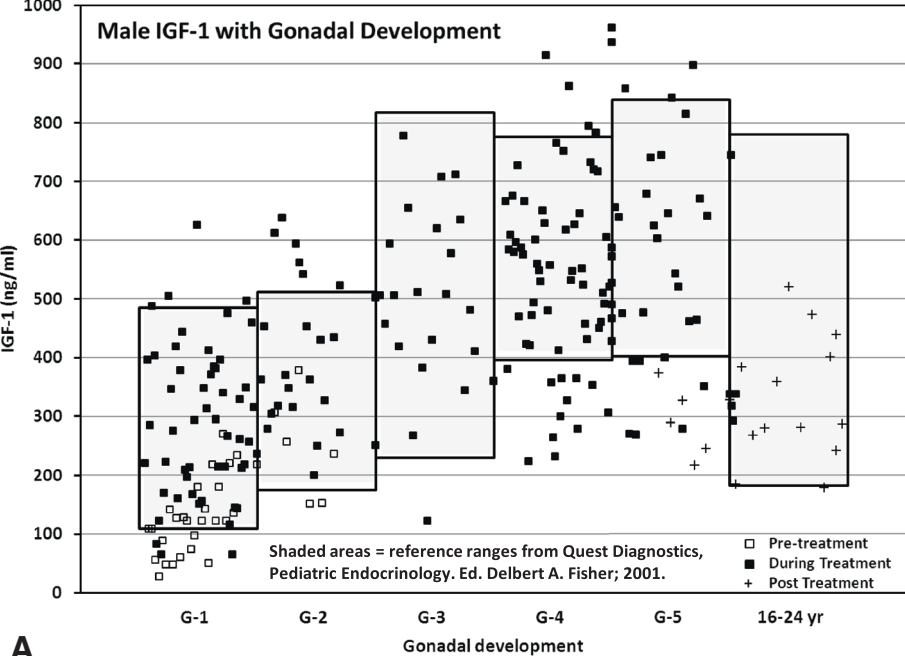

**A**

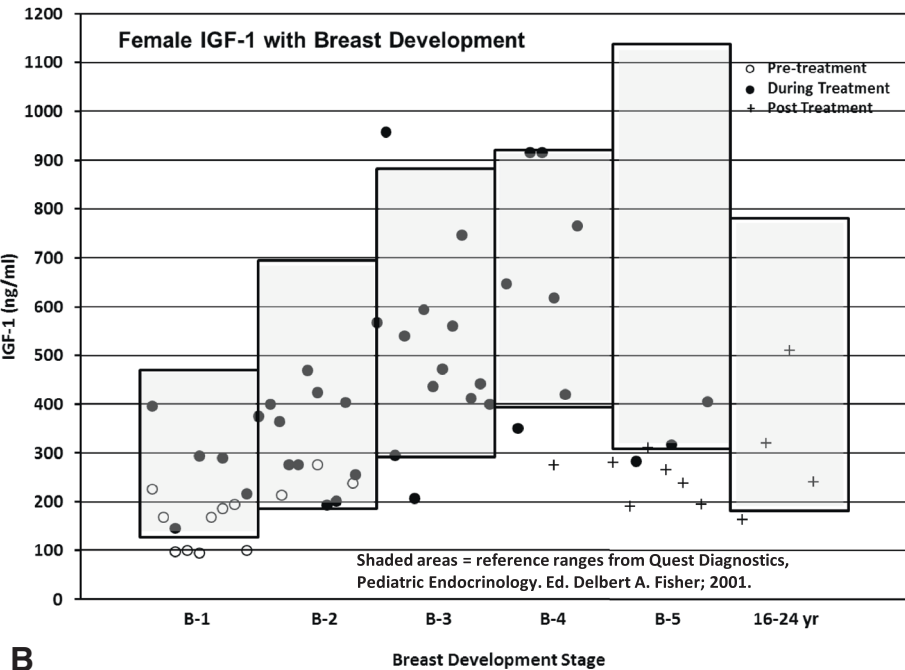

**B**

Supplement: MOESM9 [file 9596138]
